# Supplementary material
Source: PubMed Central journal article supplement (PMC6314804)
Supplement: NIHMS1511769-supplement-1.pdf [file NIHMS1511769-supplement-1.pdf]

## Supplemental table 1<sup>1</sup>

| Primers used for PacBio allele discovery |             |                                   |                                          |                |
|------------------------------------------|-------------|-----------------------------------|------------------------------------------|----------------|
| Gene                                     | Primer name | Primer sequence                   | Predicted size                           |                |
| FCGR1A                                   | FCGR1.3_F   | [Barcode] + CCACCAGCTTGGAGACAAC   | 1181 bp                                  |                |
|                                          | FCGR1.3_R   | [Barcode] + GACGGTCCAGATCGATGG    |                                          |                |
| FCGR2A                                   | FCGR2A.3_F  | [Barcode] + GACTGGACGTTGGCACAGT   | 1010 bp                                  |                |
|                                          | FCGR2A.3_R  | [Barcode] + TTGTCATCCACTCAGCAAGC  |                                          |                |
| FCGR2B                                   | FCGR2B.3_F  | [Barcode] + GAGAAGGCTGTGACTGCTG   | 960 bp                                   |                |
|                                          | FCGR2B.3_R  | [Barcode] + AAATCCCAAGGCAAGACAATG |                                          |                |
| FCGR3A                                   | FCGR3.3_F   | [Barcode] + GAACCTGGTGGGTGACAGAG  | 864 bp                                   |                |
|                                          | FCGR3.3_R   | [Barcode] + GGGTTGCAAATCCAGAGAAA  |                                          |                |
| Primers used for MiSeq genotyping assay  |             |                                   |                                          |                |
| Gene                                     | Exon        | Primer name                       | Primer sequence                          | Predicted size |
| FCGR1A                                   | 4           | CS1_FCGR1_Ex4_F1                  | [CS1 Adapter] + TTTTGGGTTCACCTTTTTTCAGA  | 293 bp         |
|                                          |             | CS2_FCGR1_Ex4_R1                  | [CS2 Adapter] + TGACTGTTCTATACGATACCTTTC |                |
| FCGR2A                                   | 3           | CS1_FCGR2A_Ex3_Fv3                | [CS1 Adapter] + CCCTTCAGGGTTATTTATTCACA  | 325 bp         |
|                                          |             | CS2_FCGR2A_Ex3_R4                 | [CS2 Adapter] + AGGGCCTTCCTCCACTGAC      |                |
| FCGR2A                                   | 4           | CS1_FCGR2A_Ex4_Fv2                | [CS1 Adapter] + AAAATGAGCTGAAAACTCTTGGA  | 348 bp         |
|                                          |             | CS2_FCGR2A_Ex4_Rv2                | [CS2 Adapter] + CCCTACATCTTGGCAGATTCC    |                |
| FCGR2B                                   | 4           | CS1_FCGR2B_Ex4_V1_F               | [CS1 Adapter] + GACCTCCCGGGTCCTCT        | 317 bp         |
|                                          |             | CS2_FCGR2B_Ex4_V1_R               | [CS2 Adapter] + TACATCTTGGCAGATTCCCC     |                |
| FCGR3A                                   | 3           | CS1_FCGR3_Exon3_F2                | [CS1 Adapter] + CTCACCCCATATTCTCTTGG     | 347 bp         |
|                                          |             | CS2_FCGR3_Exon3_R2                | [CS2 Adapter] + TTTGAGCACCTTTGTTTCA      |                |

<sup>1</sup> Primers used for PacBio allele discovery and MiSeq genotyping assay.

|                  |   |   |   |   |                                                                                    |   |   |   |   |   |   |   |   |   |   |   |   |   |   |   |   |   |   |
|------------------|---|---|---|---|------------------------------------------------------------------------------------|---|---|---|---|---|---|---|---|---|---|---|---|---|---|---|---|---|---|
| Human NC000001   | T | A | A | T | G                                                                                  | T | C | T | G | T | C | T | T | C | C | C | T | A | G | T | G | C |   |
| Rhesus NC_007858 | . | . | . | . | .                                                                                  | . | . | . | . | . | . | . | . | . | . | . | . | . | . | . | . | . | . |
| Mafa-FCGR2A:01   | . | . | . | G |  |   |   |   |   |   |   |   |   |   |   |   |   |   |   |   |   |   |   |
| Mafa-FCGR2A:02   | . | . | . | . | .                                                                                  | . | . | . | . | . | . | . | . | . | . | . | . | . | . | . | . | . |   |
| Mafa-FCGR2A:03   | . | . | . | . | .                                                                                  | . | . | . | . | . | . | . | . | . | . | . | . | . | . | . | . | . |   |
| Mafa-FCGR2A:04   | . | . | . | G |  |   |   |   |   |   |   |   |   |   |   |   |   |   |   |   |   |   |   |
| Mafa-FCGR2A:05   | . | . | . | G |  |   |   |   |   |   |   |   |   |   |   |   |   |   |   |   |   |   |   |
| Mafa-FCGR2A:06   | . | . | . | G |  |   |   |   |   |   |   |   |   |   |   |   |   |   |   |   |   |   |   |
| Mafa-FCGR2A:07   | . | . | . | G |  |   |   |   |   |   |   |   |   |   |   |   |   |   |   |   |   |   |   |

**Supplemental figure 1**

The presence of an early splice site in FCGR2A:01, 04, 05, 06 and 07 causes exon 5 (colored bars) to be extended compared to FCGR2A:02 and 03, which more closely resemble the human and rhesus FCGR2A alleles.

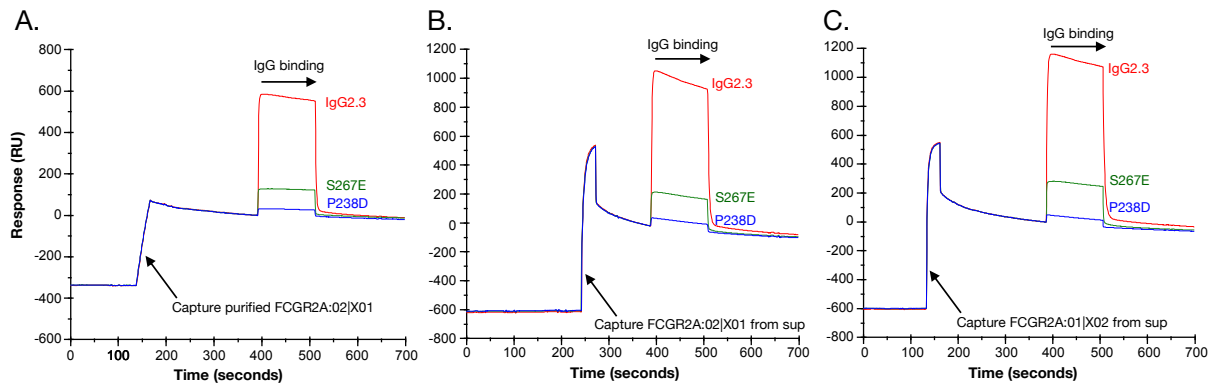

**Supplemental figure 2**

Example SPR sensorgram screening assay data for representative IgG binding to (A) purified FCGR2A:02|X01, (B) FCGR2A:02|X01 captured from supernatant, and (C) FCGR2A:01|X02 captured from supernatant.

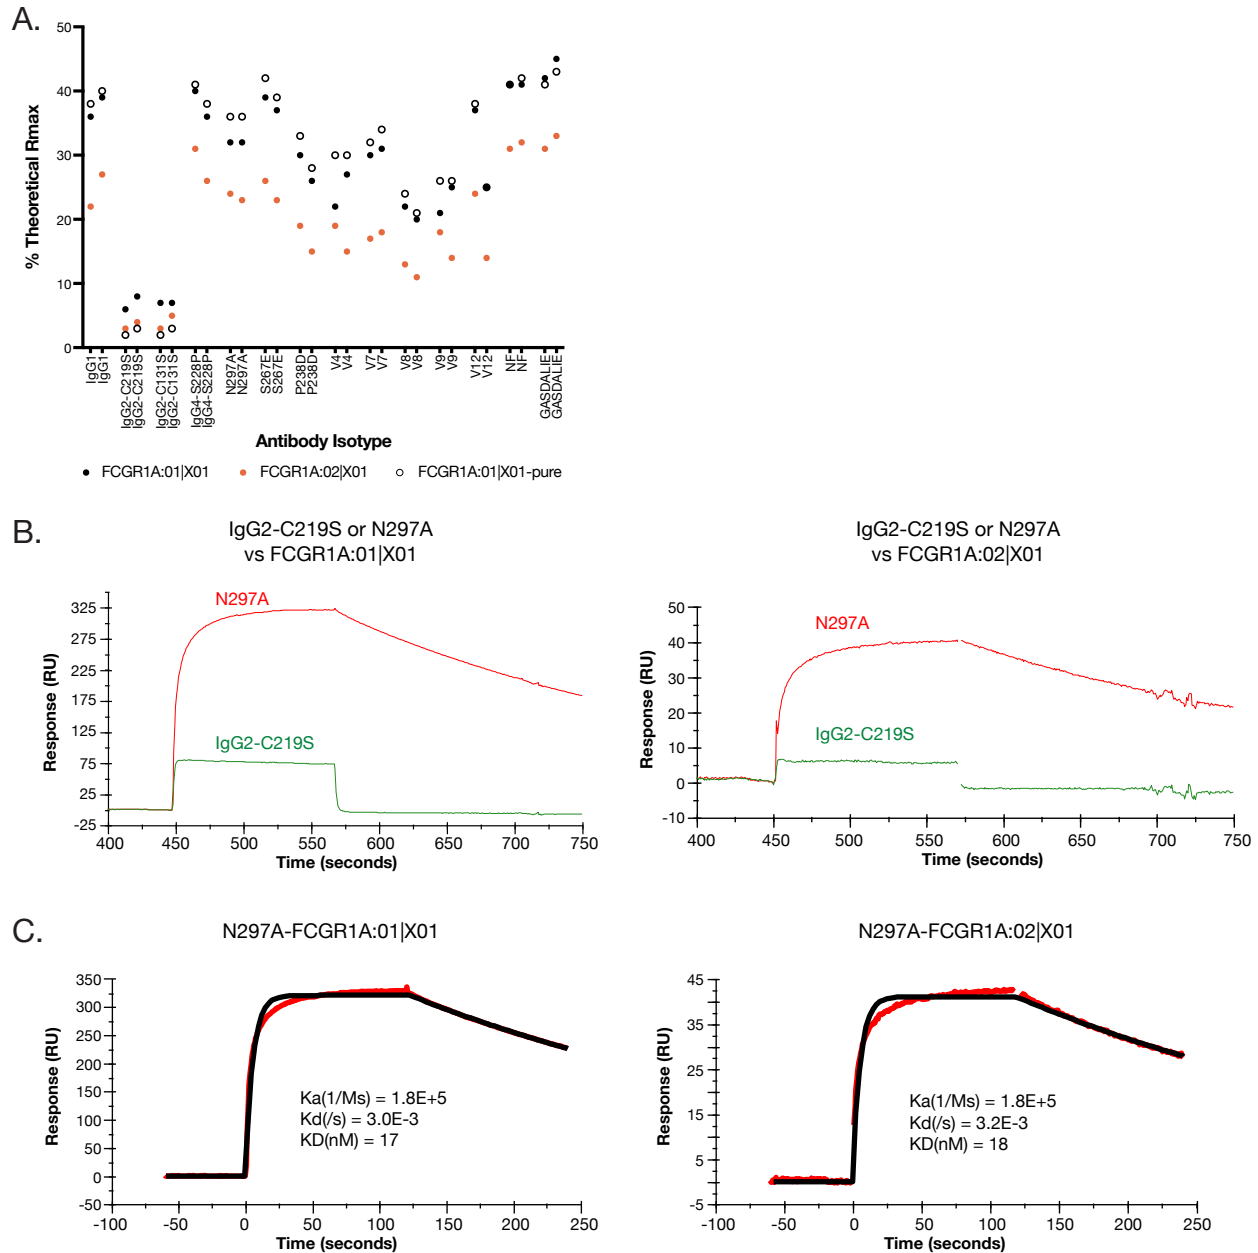

### Supplemental figure 3

FCGR1A binding to fourteen different IgG isotypes, with two different monoclonal antibodies per isotype, was tested by SPR. In the SPR screening data, similar trends in %Rmax were observed for different IgG isotypes binding to the two FCGR1A variants (A). In addition, the two variants showed similar binding kinetics in both the raw SPR sensorgram data (example data in B) and fitted data (example data in C; data, in red, was fitted to a 1:1 Langmuir binding model, in black). The expression and purification of all FCGR2A, FCGR2B, and FCGR3A variants were typical for well-behaved his-tagged proteins, with multi-mg/L yields and monomeric products with low levels of high molecular weight aggregates or degradation products as measured by size-exclusion chromatography coupled to multi-angle laser light scattering (SEC-MALS) detector. In addition, the SPR data for antibody binding was similar for these purified FCGRs and their respective unpurified supernatants (see main text). In contrast, FCGR1A was challenging to produce, had low titers (especially FCGR1A:02|X01), and the purified protein showed high levels of aggregate (>20%) even after preparative size exclusion chromatography purification. Moreover, purified FCGR1A demonstrated poor capture to the anti-His sensor chip surface, and had very low fractional activity as determined by Biacore calibration-free concentration analysis (CFCA). Despite these unique challenges with the FCGR1A extracellular domain protein constructs, the SPR data suggest that the fraction of protein that was active had similar binding activity between the two FCGR1A variants.
